# Supplementary material for: Nano-hydroxyapatite/polyaniline composite as an efficient sorbent for sensitive determination of the polycyclic aromatic hydrocarbons in air by a needle trap device
Source: Royal Society of Chemistry journal article supplement (doi:10.1039/d0ra07540j), 2020-01-01
Supplement: d0ra07540j1.pdf [file d0ra07540j1.pdf]

## Supporting Information

### **Nano-Hydroxyapatite/Polyaniline Composite as an Efficient Sorbent for Sensitive Determination of the Polycyclic Aromatic Hydrocarbons in the Air by the Needle Trap Device**

Ali Akbar Alinaghi Langari<sup>1</sup>, Saber Alizadeh<sup>2</sup>, Shiva Soury<sup>3</sup>, Ali Firoozichahak<sup>4\*</sup>, Davood Nematollahi

<sup>2</sup>, Parsa Mohammad Alizadeh<sup>1</sup>, Nasim Sanaei<sup>5</sup>

<sup>1</sup> *Student Research Committee, school of public health, Bam University of medical sciences, Bam, Iran*

<sup>2</sup> *Department of Chemistry, Bu-Ali-Sina University, Hamedan, Iran.*

<sup>3</sup> *Department of Occupational Health Engineering, School of Public Health, Ilam University of Medical Sciences, Ilam, Iran*

<sup>4</sup> *Department of Occupational Health, Faculty of Health, Social Determinants of Health Research Center, Gonabad University of Medical Science, Gonabad, Iran.*

<sup>5</sup> *Center of Excellence for Occupational Health, Occupational Health and Safety Research Center, School of Public Health, Hamadan University of Medical Sciences, Hamadan, Iran*

**Table S1:** List of the abbreviations

|              |                                             |
|--------------|---------------------------------------------|
| SPME         | Solid Phase Microextraction                 |
| NTD          | Needle Trap Device                          |
| PAHs         | Polycyclic Aromatic Hydrocarbons            |
| LOD          | Limit of Detection                          |
| LOQ          | Limit of Quantitation                       |
| RSD          | Relative Standard Deviation                 |
| BTV          | Breakthrough Volume                         |
| FE-SEM       | Field-Emission Scanning Electron Microscopy |
| XRD          | X-ray Diffraction                           |
| FT-IR        | Fourier-Transform Infrared Spectroscopy     |
| Nano-HA/PANI | Nano-Hydroxyapatite/Poly-Aniline            |

**Table S2:** List of the Units

| Parameters             | Unit of Measure                        |
|------------------------|----------------------------------------|
| Desorption Time        | °C                                     |
| Desorption Temperature | min                                    |
| Breakthrough Volume    | mL                                     |
| Carryover Effect       | Percentage (%)                         |
| Repeatability          | Relative Standard Deviation Percentage |
| Reproduction           | Relative Standard Deviation Percentage |
| Limit of Detection     | ng.mL <sup>-1</sup>                    |
| Limit of Quantitation  | ng.mL <sup>-1</sup>                    |
| Concentration          | mg.m <sup>-3</sup>                     |

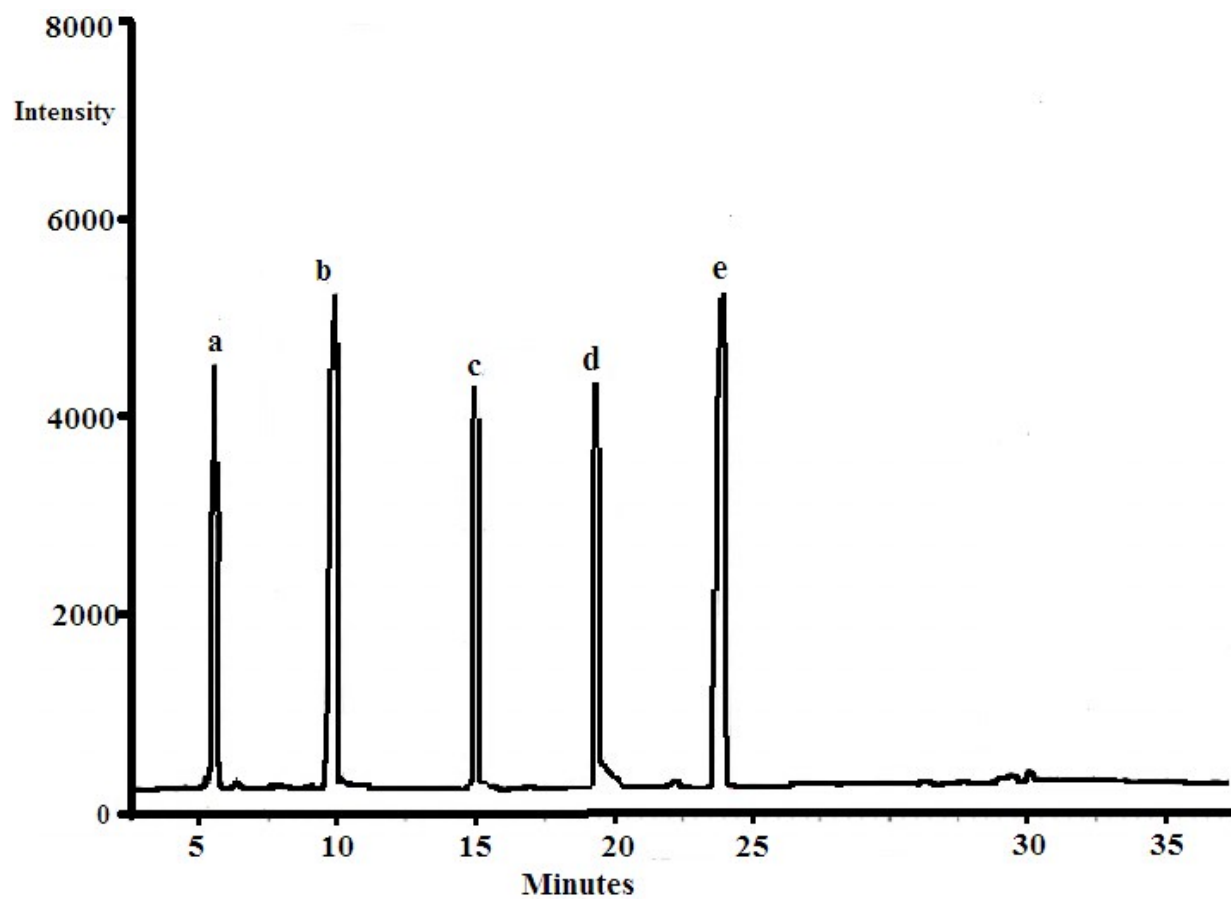

**Figure S1.** Chromatogram of PAHs compounds from NTD: PANI@HA. a) Naphthalene, b) Phenanthrene, c) Fluoranthene, d) Benzo[a]anthracene, and e) Benzo[a]pyrene.

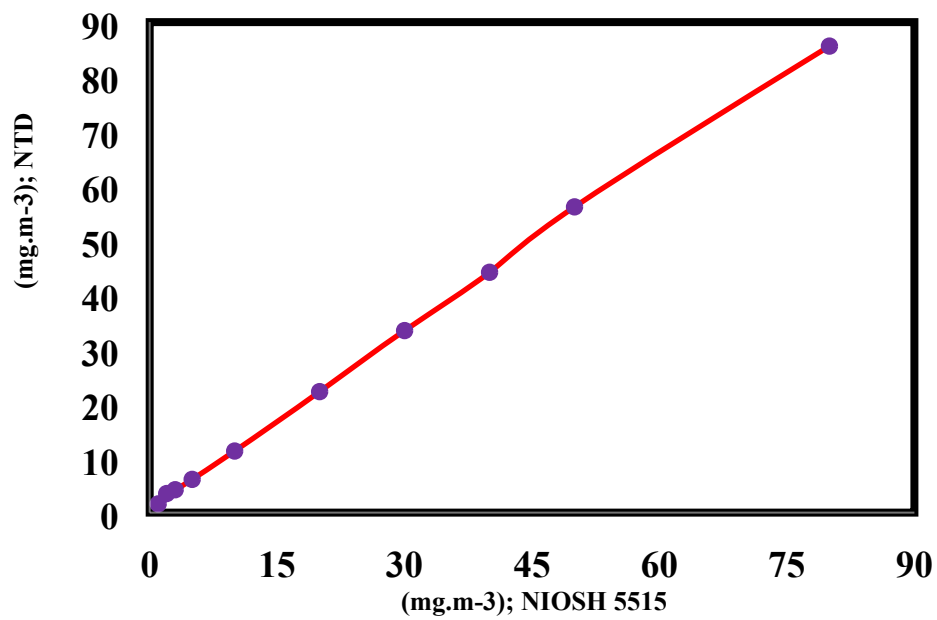

**Figure S2.** Comparison of the result between the NTD packed with PANI@HA and XAD-2 sorbent tube for the sampling of the benzo[a]pyrene
